# Supplementary material for: Salicornia ramosissima: A New Green Cosmetic Ingredient with Promising Skin Effects
Source: MDPI journal article supplement (doi:10.3390/antiox11122449), 2022-12-12

**Table S1.** Calibration data used for the quantification of individual phenolic compounds in salicornia subcritical water extracts

| Peak identification   | Compounds                             | (m $\pm$ $\Delta$ m) <sup>a</sup> | (b $\pm$ $\Delta$ b) <sup>b</sup> | r <sup>2</sup> | LOD <sup>c</sup><br>(mg/L) | LOQ <sup>d</sup><br>(mg/L) |
|-----------------------|---------------------------------------|-----------------------------------|-----------------------------------|----------------|----------------------------|----------------------------|
| <b>Phenolic acids</b> |                                       |                                   |                                   |                |                            |                            |
| 1                     | Gallic acid                           | 54220 $\pm$ 97                    | 57.7 $\pm$ 6                      | 0.9999         | 0.120                      | 0.400                      |
| 2                     | Protocatechuic acid                   | 32064 $\pm$ 24                    | 1024 $\pm$ 477                    | 0.9999         | 0.104                      | 0.346                      |
| 3                     | Neochlorogenic acid                   | 50502 $\pm$ 344                   | 5751 $\pm$ 288                    | 0.9998         | 0.449                      | 1.495                      |
| 5                     | Caftaric acid                         | 18700 $\pm$ 50                    | 966 $\pm$ 48.3                    | 0.9999         | 0.177                      | 0.591                      |
| 7                     | Chlorogenic acid                      | 27244 $\pm$ 57                    | -1445 $\pm$ 144                   | 0.9999         | 0.292                      | 0.972                      |
| 8                     | 4- <i>O</i> -caffeoylquinic acid      | 12334 $\pm$ 202                   | -1032 $\pm$ 52                    | 0.9995         | 0.19                       | 0.632                      |
| 9                     | Vanillic acid                         | 36254 $\pm$ 55                    | 1215 $\pm$ 121                    | 0.9999         | 0.215                      | 0.715                      |
| 10                    | Caffeic acid                          | 69190 $\pm$ 45                    | 124 $\pm$ 12                      | 0.9999         | 0.090                      | 0.302                      |
| 11                    | Syringic acid                         | 61262 $\pm$ 72                    | 2088 $\pm$ 209                    | 0.9999         | 0.165                      | 0.551                      |
| 13                    | <i>p</i> -coumaric acid               | 146520 $\pm$ 1176                 | -33763 $\pm$ 3376                 | 0.9991         | 1.70                       | 5.68                       |
| 14                    | <i>trans</i> -Ferulic acid            | 61448 $\pm$ 39                    | 1501.6 $\pm$ 789                  | 0.9999         | 0.089                      | 0.298                      |
| 15                    | Sinapic acid                          | 29742 $\pm$ 16                    | 124 $\pm$ 12                      | 0.9999         | 0.075                      | 0.25                       |
| 18                    | 3,5-di- <i>O</i> -caffeoylquinic acid | 62289 $\pm$ 829                   | -11003 $\pm$ 3153                 | 0.9991         | 0.341                      | 1.13                       |
| 24                    | Ellagic acid                          | 44947 $\pm$ 1040                  | -30767 $\pm$ 20152                | 0.9973         | 3.09                       | 10.3                       |
| 25                    | 3,4-di- <i>O</i> -caffeoylquinic acid | 28503 $\pm$ 410                   | 32 $\pm$ 3                        | 0.9991         | 0.383                      | 1.27                       |

| Peak identification | Compounds                     | (m ± Δm) <sup>a</sup> | (b ± Δb) <sup>b</sup> | r <sup>2</sup> | LOD <sup>c</sup><br>(mg/L) | LOQ <sup>d</sup><br>(mg/L) |
|---------------------|-------------------------------|-----------------------|-----------------------|----------------|----------------------------|----------------------------|
| 27                  | Cinnamic acid                 | 183447 ± 103          | 2472 ± 247            | 0.9999         | 0.079                      | 0.263                      |
| <b>Flavanols</b>    |                               |                       |                       |                |                            |                            |
| 4                   | Catechin                      | 13826 ± 56            | 3021 ± 1127           | 0.9999         | 0.568                      | 1.89                       |
| 12                  | Epicatechin                   | 15117 ± 60            | 1178 ± 118            | 0.9999         | 0.558                      | 1.86                       |
| <b>Flavanones</b>   |                               |                       |                       |                |                            |                            |
| 17                  | Naringin                      | 36536 ± 25            | 1384 ± 499            | 0.9999         | 0.095                      | 0.317                      |
| 33                  | Naringenin                    | 68101 ± 90            | -2516 ± 1813          | 0.9999         | 0.186                      | 0.619                      |
| <b>Flavonols</b>    |                               |                       |                       |                |                            |                            |
| 19                  | Quercetin-3-O-galactoside     | 23597 ± 27            | 466 ± 47              | 0.9999         | 0.159                      | 0.531                      |
| 21                  | Quercetin-3-O-glucopyranoside | 48964 ± 119           | 17.0 ± 0.9            | 0.9999         | 0.161                      | 0.535                      |
| 22                  | Rutin hydrate                 | 83207 ± 51            | 1937 ± 1034           | 0.9999         | 0.087                      | 0.289                      |
| 26                  | Myricetin                     | 27506 ± 260           | -12304 ± 5242         | 0.995          | 1.32                       | 4.43                       |
| 28                  | Quercitrin                    | 32796 ± 199           | 2974 ± 149            | 0.9999         | 0.399                      | 1.331                      |
| 29                  | Kaempferol-3-O-glucoside      | 22171 ± 45            | 792 ± 79              | 0.9999         | 0.286                      | 0.955                      |
| 30                  | Isorhamnetin-3-O-glucoside    | 31445 ± 101           | 2000 ± 100            | 0.9999         | 0.211                      | 0.702                      |
| 31                  | Kaempferol-3-O-rutinoside     | 24228 ± 55            | -1094 ± 109           | 0.9999         | 0.319                      | 1.06                       |
| 32                  | Isorhamnetin-3-O-rutinoside   | 23574 ± 115           | 2374 ± 119            | 0.9999         | 0.323                      | 1.075                      |

| Peak identification | Compounds                 | (m ± Δm) <sup>a</sup> | (b ± Δb) <sup>b</sup> | r <sup>2</sup> | LOD <sup>c</sup><br>(mg/L) | LOQ <sup>d</sup><br>(mg/L) |
|---------------------|---------------------------|-----------------------|-----------------------|----------------|----------------------------|----------------------------|
| 35                  | Quercetin                 | 30017 ± 212           | -7386 ± 739           | 0.9997         | 0.992                      | 3.30                       |
| 37                  | Tiliroside                | 67386 ± 95            | -1771 ± 177           | 0.9999         | 0.198                      | 0.658                      |
| 38                  | Kaempferol                | 33473 ± 102           | -3301 ± 330           | 0.9999         | 0.430                      | 1.43                       |
| <b>Flavones</b>     |                           |                       |                       |                |                            |                            |
| 39                  | Apigenin                  | 100189 ± 353          | -7277 ± 727           | 0.9999         | 0.495                      | 1.65                       |
| 40                  | Chrysin                   | 88535 ± 143           | -3131 ± 313           | 0.9999         | 0.226                      | 0.755                      |
| <b>Stilbenes</b>    |                           |                       |                       |                |                            |                            |
| 16                  | <i>trans</i> -Polydatin   | 64539 ± 221           | 4280 ± 214            | 0.9999         | 0.226                      | 0.753                      |
| 20                  | Resveratrol               | 181186 ± 1303         | -16059 ± 803          | 0.9998         | 0.474                      | 1.579                      |
| 34                  | <i>trans</i> -ε-viniferin | 61705 ± 529           | -1021 ± 51            | 0.9997         | 0.564                      | 1.88                       |
| <b>Chalcones</b>    |                           |                       |                       |                |                            |                            |
| 23                  | Phloridzin dehydrate      | 47726 ± 42            | 78 ± 8                | 0.9999         | 0.125                      | 0.416                      |
| 36                  | Phloretin                 | 71734 ± 154           | 84 ± 8                | 0.9999         | 0.302                      | 1.01                       |
| <b>Others</b>       |                           |                       |                       |                |                            |                            |
| 6                   | Caffeine                  | 54054 ± 257           | 6136 ± 307            | 0.9999         | 0.313                      | 1.043                      |

<sup>a</sup>m: slope ± standard deviation (n = 5) expressed in μV min/mg L; <sup>b</sup>b: intercept ± standard deviation (n = 5) expressed in μV min; <sup>c</sup>LOD: limit of detection; <sup>d</sup>LOQ: limit of quantification.

**Figure S1.** HPLC-PDA chromatograms monitored at 280 nm for *S. ramosissima* extracts obtained at 110 °C (pink line), at 120 °C (blue line), at 140 °C (brown line), at 160 °C (green line) and at 180 °C (dark blue line).

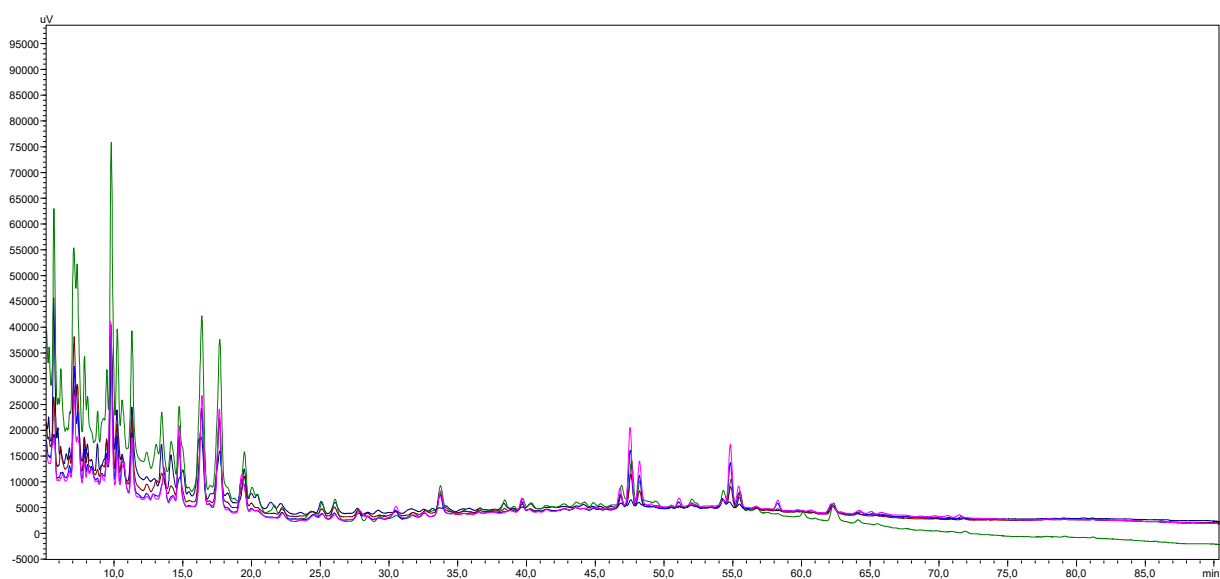

Supplement: s1 [file s1]
